# Supplementary material
Source: PubMed Central journal article supplement (PMC2822898)
Supplement: NIHMS165052-supplement-1.pdf [file NIHMS165052-supplement-1.pdf]

SUPPLEMENTARY TABLE 1A. DESCRIPTION OF MOUSE *Ets2*-TAM MICROARRAY

|                     |                                                                                                                                                                                                                                                                                                                                |
|---------------------|--------------------------------------------------------------------------------------------------------------------------------------------------------------------------------------------------------------------------------------------------------------------------------------------------------------------------------|
| <b>TITLE</b>        | Expression Data from <i>Ets2</i> -deficient tumor associated macrophages                                                                                                                                                                                                                                                       |
| <b>STUDY DESIGN</b> | YFP-positive <i>Ets2</i> <sup>+/+</sup> / <i>Ets2</i> <sup>-/-</sup> remodeling and tumor macrophages were isolated by Fluorescence Activated Cell Sorting from normal developing mammary glands and <i>PyMT</i> -induced mammary tumors respectively, RNA was extracted and Affymetrix gene expression arrays were performed. |

**SAMPLE INFORMATION:**

|                        |                                                                                                                       |                                                                     |                                                                  |                                                                                   |
|------------------------|-----------------------------------------------------------------------------------------------------------------------|---------------------------------------------------------------------|------------------------------------------------------------------|-----------------------------------------------------------------------------------|
| <b>Organism:</b>       | <i>Mus musculus</i>                                                                                                   |                                                                     |                                                                  |                                                                                   |
| <b>Source Name:</b>    | Mammary macrophages isolated from: (a) developing mammary gland, and (b) <i>PyMT</i> -induced early mammary carcinoma |                                                                     |                                                                  |                                                                                   |
| <b>Strain:</b>         | FVBN                                                                                                                  |                                                                     |                                                                  |                                                                                   |
| <b>Sex:</b>            | Female                                                                                                                |                                                                     |                                                                  |                                                                                   |
| <b>Age:</b>            | 50 days (for isolation remodeling macrophages), 75 days (for isolation of tumor associated macrophages)               |                                                                     |                                                                  |                                                                                   |
| <b>Tissue:</b>         | Mammary gland                                                                                                         |                                                                     |                                                                  |                                                                                   |
| <b>Cell Type:</b>      | Macrophages                                                                                                           |                                                                     |                                                                  |                                                                                   |
| <b>Molecule:</b>       | Total mRNA                                                                                                            |                                                                     |                                                                  |                                                                                   |
| <b>Label:</b>          | Biotin                                                                                                                |                                                                     |                                                                  |                                                                                   |
| <b>Sample Name:</b>    | D.WT                                                                                                                  | D.E2                                                                | T.WT                                                             | T.E2                                                                              |
| <b>Sample Details:</b> | One copy of <i>Ets2</i> (no tumor, 50 days)                                                                           | <i>Lys-Cre</i> -mediated <i>Ets2</i> deletion (no tumor, 50 days)   | One copy of <i>Ets2</i> (tumor, 75days)                          | <i>Lys-Cre</i> -mediated <i>Ets2</i> deletion (tumor, 75days)                     |
| <b>Genotype:</b>       | <i>Ets2</i> <sup>LoxP/db</sup> ; <i>c-fms</i> -YFP                                                                    | <i>Ets2</i> <sup>LoxP/db</sup> ; <i>Lys-Cre</i> ; <i>c-fms</i> -YFP | <i>PyMT</i> ; <i>Ets2</i> <sup>LoxP/db</sup> ; <i>c-fms</i> -YFP | <i>PyMT</i> ; <i>Ets2</i> <sup>LoxP/db</sup> ; <i>Lys-Cre</i> ; <i>c-fms</i> -YFP |

**ARRAY INFORMATION:**

|                    |                                        |
|--------------------|----------------------------------------|
| <b>Array Used:</b> | Affymetrix Mouse Genome 430A 2.0 Array |
| <b>Platform:</b>   | GPL8321                                |

**PROTOCOLS USED:**

|                                |                                                                                                                                                                                                                                                                                                                                |
|--------------------------------|--------------------------------------------------------------------------------------------------------------------------------------------------------------------------------------------------------------------------------------------------------------------------------------------------------------------------------|
| <b>Isolation Protocol:</b>     | Minced mammary glands/mammary tumors were digested with 20mg Collagenase Type 2 (Worthington), 480 Units DNaseI (Boehringer) and 1mM MgCl <sub>2</sub> at 37°C and then stroma was enriched by gravity separation. The YFP-positive cell population was sorted using Fluorescent Activated Cell Sorting with the BD FACSAria™. |
| <b>Extraction Protocol:</b>    | RNA was extracted with the RNeasy Stratagene micro-prep column (Stratagene) as per the manufacturer's instructions.                                                                                                                                                                                                            |
| <b>Label Protocol:</b>         | Biotinylated cRNA was prepared according to the standard Affymetrix protocol from 2 ug total RNA (Expression Analysis Technical Manual, 2007, Affymetrix).                                                                                                                                                                     |
| <b>Hybridization Protocol:</b> | Following fragmentation, 15 ug of cRNA was hybridized for 16 hours at 44°C on Mouse Exon 1.0 ST GeneChips. GeneChips were washed and stained in the Affymetrix Fluidics Station 400.                                                                                                                                           |
| <b>Scan protocol:</b>          | GeneChips were scanned using the Affymetrix GeneChip Scanner 3000 7G                                                                                                                                                                                                                                                           |
| <b>Data Processing:</b>        | RMA method was applied to the primary data to correct the technical bias and summarize gene expression values over probe sets                                                                                                                                                                                                  |

|                          |                                                                                                                                                                                                                                                                                                                                                                                                                                                                                                                                                                                                                                                                                                                                                                                                                                                                                                                                                                                                                                                                                                                                                                                                                                                                               |
|--------------------------|-------------------------------------------------------------------------------------------------------------------------------------------------------------------------------------------------------------------------------------------------------------------------------------------------------------------------------------------------------------------------------------------------------------------------------------------------------------------------------------------------------------------------------------------------------------------------------------------------------------------------------------------------------------------------------------------------------------------------------------------------------------------------------------------------------------------------------------------------------------------------------------------------------------------------------------------------------------------------------------------------------------------------------------------------------------------------------------------------------------------------------------------------------------------------------------------------------------------------------------------------------------------------------|
| <b>Value Definition:</b> | Log2 expression values                                                                                                                                                                                                                                                                                                                                                                                                                                                                                                                                                                                                                                                                                                                                                                                                                                                                                                                                                                                                                                                                                                                                                                                                                                                        |
| <b>Data Analysis:</b>    | <p>All values are represented as Log2. The primary data was analyzed by modified RMA method to yield average gene expression values (1, 2).</p> <p>For the subsequent analysis, gene expression differences between normal macrophages with or without Ets2 were compared to the differences between tumor macrophages with and without Ets2, and a value termed the Interaction (INT) value was derived. The formula used for determining INT was:<br/> <math display="block">\text{INT} = [(D.WT - D.E2) - (T.WT - T.E2)]</math></p> <p>T.E2 and D.E2 are the average values for expression of a given gene in tumor macrophages and normal developmental macrophages that lack Ets2, respectively, and T.WT and D.WT are the corresponding values for the same gene in tumor and developmental macrophages containing Ets2. This equation captures differences in gene expression in tumor macrophages compared to normal developmental macrophages with Ets2, that is, tumor-specific effects.</p> <p>Gene ontology analysis was performed using DAVID Bioinformatics 2008 Tool (bioinformatics source of National Institute of Allergy and Infectious Diseases, NIH). The biological processes regulated were confirmed by manual curation (available upon request).</p> |

## REFERENCES

1. Auer H, Newsom D, Nowak N, et al. Gene-resolution analysis of DNA copy number variation using oligonucleotide expression microarrays. *BMC Genomics* 2007; 8: 111.
2. Irizarry R, Hobbs B, Collin F, et al. Exploration, normalization, and summaries of high density oligonucleotide array probe level data. *Biostatistics* 2003; 4: 249-64

SUPPLEMENTARY TABLE 1B. LIST OF GENES DIFFERENTIALLY EXPRESSED (>3 FOLD) IN *Ets2*-DEFICIENTAll values are  $\log_2$ 

| Probe set    | NLP   | D.WT   | D.E2  | T.WT  | T.E2  | INT   | Gene     | Gene information                                            |
|--------------|-------|--------|-------|-------|-------|-------|----------|-------------------------------------------------------------|
| 1418666_at   | 7.62  | 10.734 | 4.964 | 7.552 | 7.186 | 5.404 | Ptx3     | pentraxin related gene                                      |
| 1451632_a_at | 5.34  | 4.573  | 4.269 | 4.45  | 9.425 | 5.279 | Igh-1a   | immunoglobulin heavy chain 1a (serum IgG2a)                 |
| 1425896_a_at | 7.62  | 8.908  | 4.096 | 6.602 | 6.468 | 4.678 | Fbn1     | fibrillin 1                                                 |
| 1417625_s_at | 6.66  | 10.915 | 6.380 | 8.326 | 8.306 | 4.515 | Cmkor1   | chemokine orphan receptor 1                                 |
| 1420466_at   | 5.34  | 3.86   | 3.908 | 3.817 | 8.146 | 4.281 | Spt2     | salivary protein 2                                          |
| 1442169_at   | 7.62  | 8.384  | 4.335 | 5.619 | 5.803 | 4.233 | Vldlr    | very low density lipoprotein receptor                       |
| 1451527_at   | 5.34  | 8.222  | 3.734 | 5.828 | 5.489 | 4.149 | Pcolce2  | procollagen C-endopeptidase enhancer 2                      |
| 1417012_at   | 7.65  | 7.656  | 4.763 | 6.000 | 7.210 | 4.103 | Sdc2     | syndecan 2                                                  |
| 1427256_at   | 7.88  | 8.643  | 6.057 | 5.864 | 7.304 | 4.026 | Cspg2    | chondroitin sulfate proteoglycan 2                          |
| 1451156_s_at | 6.66  | 7.910  | 4.288 | 5.329 | 5.694 | 3.987 | Vldlr    | very low density lipoprotein receptor                       |
| 1448501_at   | 8.91  | 7.515  | 4.315 | 6.285 | 7.058 | 3.973 | Tspan6   | tetraspanin 6                                               |
| 1418454_at   | 8.59  | 10.208 | 6.563 | 8.415 | 8.646 | 3.876 | Mfap5    | microfibrillar associated protein 5                         |
| 1420627_a_at | 7.36  | 3.996  | 3.673 | 4.585 | 8.064 | 3.802 | Csna     | casein alpha                                                |
| 1450843_a_at | 5.73  | 8.585  | 5.592 | 6.618 | 7.41  | 3.785 | Serpinh1 | serine (or cysteine) peptidase inhibitor, clade H, member 1 |
| 1422639_at   | 8.40  | 6.689  | 4.347 | 4.468 | 5.903 | 3.777 | Calcb    | calcitonin-related polypeptide, beta                        |
| 1456733_x_at | 9.44  | 8.640  | 5.581 | 6.587 | 7.275 | 3.747 | Serpinh1 | serine (or cysteine) peptidase inhibitor, clade H, member 1 |
| 1449082_at   | 8.59  | 10.516 | 7.482 | 8.769 | 9.387 | 3.652 | Mfap5    | microfibrillar associated protein 5                         |
| 1416473_a_at | 5.34  | 8.337  | 4.879 | 5.81  | 5.973 | 3.621 | Nope     | neighbor of Punc E11                                        |
| 1427381_at   | 10.49 | 9.031  | 6.657 | 7.231 | 8.445 | 3.588 | Irg1     | immunoresponsive gene 1                                     |
| 1434479_at   | 8.59  | 8.133  | 5.518 | 6.070 | 7.022 | 3.567 | Col5a1   | Procollagen, type V, alpha 1 (Col5a1), mRNA                 |
| 1416474_at   | 5.34  | 8.359  | 4.502 | 6.062 | 5.703 | 3.498 | Nope     | neighbor of Punc E11                                        |
| 1418753_at   | 6.66  | 9.388  | 5.834 | 6.874 | 6.796 | 3.476 | Gfpt2    | glutamine fructose-6-phosphate transaminase 2               |
| 1450923_at   | 9.44  | 9.307  | 7.454 | 7.677 | 9.298 | 3.474 | Tgfb2    | transforming growth factor, beta 2                          |
| 1425247_a_at | 3.92  | 4.299  | 4.478 | 4.742 | 8.375 | 3.454 | Igh-4    | immunoglobulin heavy chain 4 (serum IgG1)                   |
| 1416221_at   | 8.59  | 10.446 | 7.122 | 8.124 | 8.254 | 3.454 | Fstl1    | follistatin-like 1                                          |
| 1448201_at   | 6.87  | 9.430  | 6.293 | 7.859 | 8.169 | 3.447 | Sfrp2    | secreted frizzled-related sequence protein 2                |
| 1448789_at   | 5.31  | 7.458  | 4.227 | 5.28  | 5.495 | 3.446 | Aldh1a3  | aldehyde dehydrogenase family 1, subfamily A3               |
| 1417785_at   | 7.62  | 8.851  | 5.262 | 6.983 | 6.837 | 3.443 | Pla1a    | phospholipase A1 member A                                   |
| 1451978_at   | 7.62  | 8.156  | 4.696 | 6.544 | 6.521 | 3.437 | Loxl1    | lysyl oxidase-like 1                                        |
| 1460208_at   | 6.51  | 9.283  | 5.914 | 7.919 | 7.974 | 3.424 | Fbn1     | fibrillin 1                                                 |
| 1419370_a_at | 2.51  | 12.397 | 8.862 | 9.041 | 8.9   | 3.394 | Mfap1    | microfibrillar-associated protein 1                         |
| 1423669_at   | 10.49 | 10.757 | 8.137 | 9.013 | 9.771 | 3.378 | Col1a1   | procollagen, type I, alpha 1                                |
| 1448395_at   | 7.88  | 7.542  | 4.701 | 6.093 | 6.616 | 3.364 | Sfrp1    | secreted frizzled-related sequence protein 1                |
| 1427482_a_at | 4.8   | 7.135  | 4.229 | 5.446 | 5.893 | 3.353 | Car8     | carbonic anhydrase 8                                        |
| 1449335_at   | 5.86  | 9.324  | 6.326 | 7.001 | 7.336 | 3.333 | Timp3    | tissue inhibitor of metalloproteinase 3                     |
| 1427231_at   | 7.62  | 8.096  | 4.748 | 5.695 | 5.679 | 3.332 | Robo1    | roundabout homolog 1 (Drosophila)                           |
| 1417011_at   | 7.88  | 9.687  | 6.739 | 8.614 | 8.994 | 3.328 | Sdc2     | syndecan 2                                                  |
| 1429514_at   | 6.41  | 10.028 | 7.080 | 7.555 | 7.929 | 3.322 | Ppap2b   | phosphatidic acid phosphatase type 2B                       |
| 1432129_a_at | 5.34  | 7.376  | 4.771 | 5.139 | 5.776 | 3.242 | Prrx1    | paired related homeobox 1                                   |
| 1417439_at   | 8.59  | 9.337  | 6.268 | 7.061 | 7.208 | 3.216 | Cd248    | CD248 antigen, endosialin                                   |
| 1450663_at   | 8.91  | 9.810  | 6.791 | 7.927 | 8.117 | 3.209 | Thbs2    | thrombospondin 2                                            |
| 1424807_at   | 6.51  | 7.485  | 4.351 | 6.044 | 6.109 | 3.199 | Lama4    | laminin, alpha 4                                            |
| 1416744_at   | 5.73  | 6.668  | 4.376 | 4.211 | 5.113 | 3.194 | Uap1     | UDP-N-acetylglucosamine pyrophosphorylase 1                 |
| 1420408_a_at | 5.62  | 7.022  | 4.428 | 5.815 | 6.412 | 3.191 | Abcc9    | ATP-binding cassette, sub-family C (CFTR/MRP), member 9     |
| 1455090_at   | 5.34  | 9.163  | 6.556 | 6.624 | 7.193 | 3.176 | Angptl2  | Angiopoietin-like 2 (Angptl2), mRNA                         |
| 1441342_at   | 6.68  | 7.744  | 5.249 | 5.368 | 6.010 | 3.137 | Dpp4     | Dipeptidylpeptidase 4, mRNA (cDNA clone MGC:14076 )         |
| 1455466_at   | 5.34  | 9.269  | 6.125 | 7.194 | 7.181 | 3.131 | Gpr133   | G protein-coupled receptor 133                              |
| 1416953_at   | 10.49 | 7.558  | 4.446 | 9.399 | 9.382 | 3.095 | Ctgf     | connective tissue growth factor                             |
| 1449334_at   | 7.62  | 7.885  | 5.034 | 6.427 | 6.665 | 3.089 | Timp3    | tissue inhibitor of metalloproteinase 3                     |
| 1424114_s_at | 8.39  | 8.883  | 6.049 | 6.945 | 7.188 | 3.077 | Lamb1-1  | laminin B1 subunit 1                                        |

| Probe set    | NLP   | D.WT   | D.E2  | T.WT   | T.E2   | INT   | Gene       | Gene information                                                       |
|--------------|-------|--------|-------|--------|--------|-------|------------|------------------------------------------------------------------------|
| 1418547_at   | 8.59  | 7.111  | 4.286 | 5.919  | 6.145  | 3.051 | Tfpi2      | tissue factor pathway inhibitor 2                                      |
| 1448259_at   | 8.91  | 11.122 | 8.291 | 9.524  | 9.743  | 3.050 | Fstl1      | follistatin-like 1                                                     |
| 1422437_at   | 10.49 | 8.708  | 6.017 | 7.255  | 7.602  | 3.038 | Col5a2     | procollagen, type V, alpha 2                                           |
| 1427869_at   | 5.34  | 4.111  | 4.45  | 4.405  | 7.775  | 3.031 | Igh-4      | immunoglobulin heavy chain 4 (serum IgG1)                              |
| 1424007_at   | 5.34  | 7.039  | 4.274 | 4.289  | 4.55   | 3.026 | Gdf10      | growth differentiation factor 10                                       |
| 1419089_at   | 7.39  | 9.983  | 6.806 | 7.772  | 7.596  | 3.001 | Timp3      | tissue inhibitor of metalloproteinase 3                                |
| 1450757_at   | 7.49  | 8.380  | 6.109 | 6.784  | 7.510  | 2.997 | Cdh11      | cadherin 11                                                            |
| 1450808_at   | 5.13  | 7.71   | 6.027 | 6.32   | 7.585  | 2.948 | Fpr1       | formyl peptide receptor 1                                              |
| 1450826_a_at | 6.66  | 7.033  | 6.466 | 7.429  | 9.802  | 2.940 | Saa3       | serum amyloid A 3                                                      |
| 1449893_a_at | 3.02  | 5.386  | 4.233 | 4.254  | 6.021  | 2.92  | Lrig1      | leucine-rich repeats and immunoglobulin-like domains 1                 |
| 1424254_at   | 10.49 | 8.789  | 7.901 | 7.780  | 9.805  | 2.913 | Ifitm1     | interferon induced transmembrane protein 1                             |
| 1442494_at   | 6.87  | 7.185  | 5.652 | 4.917  | 6.285  | 2.901 | 30209G04F  | Ubiquitin protein ligase E3 component n-recognin 2 (Ubr2), mRNA        |
| 1434465_x_at | 8.59  | 9.446  | 6.771 | 8.063  | 8.280  | 2.892 | Vldlr      | very low density lipoprotein receptor                                  |
| 1452196_a_at | 10.49 | 8.002  | 6.019 | 7.253  | 8.161  | 2.891 | Nckap1     | NCK-associated protein 1                                               |
| 1425324_x_at | 3.38  | 4.733  | 4.462 | 4.733  | 7.349  | 2.887 | Igh-4      | immunoglobulin heavy chain 4 (serum IgG1)                              |
| 1418147_at   | 10.49 | 5.938  | 4.036 | 8.858  | 9.836  | 2.880 | Tcfap2c    | transcription factor AP-2, gamma                                       |
| 1438789_s_at | 3.44  | 5.176  | 4.079 | 3.592  | 5.372  | 2.877 | Dpysl3     | dihydropyrimidinase-like 3                                             |
| 1426947_x_at | 10.49 | 7.409  | 5.248 | 6.662  | 7.375  | 2.874 | Col6a2     | procollagen, type VI, alpha 2                                          |
| 1420370_s_at | 3.92  | 4.162  | 3.937 | 4.834  | 7.481  | 2.872 | Csnb       | casein beta                                                            |
| 1416686_at   | 3.38  | 6.843  | 4.142 | 4.823  | 4.986  | 2.864 | Plod2      | procollagen lysine, 2-oxoglutarate 5-dioxygenase 2                     |
| 1427756_x_at | 5.34  | 4.202  | 4.202 | 4.202  | 7.061  | 2.859 | Igh-4      | immunoglobulin heavy chain 4 (serum IgG1)                              |
| 1421172_at   | 5.34  | 7.992  | 6.357 | 5.05   | 6.272  | 2.857 | Adam12     | a disintegrin and metallopeptidase domain 12 (meltrin alpha)           |
| 1451538_at   | 8.40  | 6.565  | 4.681 | 9.847  | 10.802 | 2.839 | Sox9       | SRY-box containing gene 9                                              |
| 1418921_at   | 3.38  | 6.722  | 4.262 | 5.273  | 5.644  | 2.831 | Igsf4b     | immunoglobulin superfamily, member 4B                                  |
| 1460302_at   | 7.88  | 9.092  | 7.337 | 5.252  | 6.318  | 2.821 | Thbs1      | thrombospondin 1                                                       |
| 1448816_at   | 3.92  | 8.13   | 5.124 | 5.716  | 5.517  | 2.807 | Ptgis      | prostaglandin I2 (prostacyclin) synthase                               |
| 1460282_at   | 4.44  | 5.706  | 4.274 | 4.687  | 6.062  | 2.807 | Trem1      | triggering receptor expressed on myeloid cells 1                       |
| 1452590_a_at | 5.72  | 8.627  | 5.962 | 7.073  | 7.193  | 2.785 | Plac9      | placenta specific 9                                                    |
| 1416749_at   | 6.66  | 7.766  | 5.126 | 6.162  | 6.305  | 2.783 | Htra1      | HtrA serine peptidase 1                                                |
| 1423310_at   | 7.65  | 9.467  | 7.180 | 7.889  | 8.382  | 2.780 | Tpbp       | trophoblast glycoprotein                                               |
| 1418492_at   | 3.92  | 5.75   | 3.144 | 4.26   | 4.417  | 2.763 | Grem2      | gremlin 2 homolog, cysteine knot superfamily (Xenopus laevis)          |
| 1448950_at   | 4.88  | 7.7    | 5.336 | 5.9    | 6.276  | 2.74  | Il1r1      | interleukin 1 receptor, type I                                         |
| 1439260_a_at | 4.59  | 5.06   | 3.998 | 4.275  | 5.946  | 2.733 | Enpp3      | clone IMAGE:2655671)                                                   |
| 1448673_at   | 3.68  | 6.364  | 4.127 | 4.433  | 4.926  | 2.73  | Pvrl3      | poliovirus receptor-related 3                                          |
| 1419689_at   | 2.74  | 7.35   | 4.584 | 5.062  | 5.019  | 2.723 | Gpc6       | glypican 6                                                             |
| 1434227_at   | 3.71  | 6.75   | 4.065 | 4.076  | 4.109  | 2.718 | Krtdap     | keratinocyte differentiation associated protein                        |
| 1416745_x_at | 7.36  | 7.721  | 5.902 | 4.944  | 5.839  | 2.714 | Uap1       | UDP-N-acetylglucosamine pyrophosphorylase 1                            |
| 1421171_at   | 3.71  | 7.756  | 4.785 | 4.794  | 4.521  | 2.698 | Adam12     | a disintegrin and metallopeptidase domain 12 (meltrin alpha)           |
| 1448421_s_at | 4.88  | 7.921  | 5.654 | 6.354  | 6.776  | 2.689 | Aspn       | asporin                                                                |
| 1418237_s_at | 6.33  | 7.495  | 5.544 | 5.730  | 6.454  | 2.675 | Col18a1    | procollagen, type XVIII, alpha 1                                       |
| 1448545_at   | 7.62  | 7.852  | 5.491 | 6.761  | 7.074  | 2.674 | Sdc2       | syndecan 2                                                             |
| 1419427_at   | 5.34  | 6.774  | 4.127 | 4.072  | 4.097  | 2.672 | Csf3       | colony stimulating factor 3 (granulocyte)                              |
| 1450857_a_at | 8.91  | 11.905 | 9.762 | 10.600 | 11.128 | 2.671 | Col1a2     | procollagen, type I, alpha 2                                           |
| 1449169_at   | 5.34  | 7.109  | 4.593 | 4.58   | 4.713  | 2.649 | Has2       | hyaluronan synthase 2                                                  |
| 1434542_at   | 5.34  | 10.853 | 8.547 | 8.126  | 8.461  | 2.641 | Gpt2       | glutamic pyruvate transaminase (alanine aminotransferase) 2            |
| 1436763_a_at | 4.59  | 7.12   | 5.259 | 5.743  | 6.522  | 2.64  | Klf9       | Kruppel-like factor 9                                                  |
| 1437917_at   | 10.49 | 7.196  | 5.931 | 4.362  | 5.736  | 2.639 | 530037H12F | RIKEN cDNA D530037H12 gene                                             |
| 1419073_at   | 5.34  | 8.243  | 5.611 | 5.664  | 5.664  | 2.632 | Tmeff2     | transmembrane protein with EGF-like and two follistatin-like domains 2 |
| 1427035_at   | 6.40  | 7.444  | 5.505 | 6.505  | 7.156  | 2.590 | Slc39a14   | solute carrier family 39 (zinc transporter), member 14                 |
| 1421134_at   | 8.40  | 8.351  | 6.843 | 5.131  | 6.211  | 2.588 | Areg       | amphiregulin                                                           |
| 1460227_at   | 6.04  | 6.534  | 4.859 | 6.246  | 7.156  | 2.585 | Timp1      | tissue inhibitor of metalloproteinase 1                                |
| 1451446_at   | 8.59  | 10.945 | 8.157 | 8.854  | 8.638  | 2.572 | Antxr1     | anthrax toxin receptor 1                                               |

| Probe set    | NLP   | D.WT   | D.E2  | T.WT   | T.E2   | INT   | Gene     | Gene information                                                                              |
|--------------|-------|--------|-------|--------|--------|-------|----------|-----------------------------------------------------------------------------------------------|
| 1417937_at   | 3.92  | 6.827  | 4.292 | 4.468  | 4.504  | 2.571 | Dact1    | dapper homolog 1, antagonist of beta-catenin (xenopus)                                        |
| 1424113_at   | 8.59  | 8.158  | 5.405 | 6.299  | 6.117  | 2.571 | Lamb1-1  | laminin B1 subunit 1                                                                          |
| 1421694_a_at | 3.92  | 6.514  | 4.186 | 4.856  | 5.092  | 2.564 | Cspg2    | chondroitin sulfate proteoglycan 2                                                            |
| 1416625_at   | 8.91  | 10.493 | 7.765 | 8.901  | 8.720  | 2.547 | Serping1 | serine (or cysteine) peptidase inhibitor, clade G, member 1                                   |
| 1450716_at   | 5.59  | 7.437  | 4.704 | 5.734  | 5.547  | 2.546 | Adamts1  | a disintegrin-like and metallopeptidase (reprolysin type) with thrombospondin type 1 motif, 1 |
| 1419663_at   | 8.59  | 9.971  | 7.150 | 8.091  | 7.808  | 2.538 | Ogn      | osteoglycin                                                                                   |
| 1418847_at   | 10.49 | 8.510  | 7.061 | 6.754  | 7.821  | 2.516 | Arg2     | arginase type II                                                                              |
| 1416459_at   | 3.38  | 7.04   | 4.768 | 5.179  | 5.42   | 2.513 | Arf2     | ADP-ribosylation factor 2                                                                     |
| 1423584_at   | 10.49 | 8.925  | 7.489 | 8.338  | 9.402  | 2.500 | Igfbp7   | insulin-like growth factor binding protein 7                                                  |
| 1454903_at   | 3.68  | 6.111  | 4.212 | 4.69   | 5.289  | 2.498 | Ngfr     | nerve growth factor receptor (TNFR superfamily, member 16)                                    |
| 1423017_a_at | 5.86  | 7.187  | 5.457 | 4.967  | 5.715  | 2.478 | Il1rn    | interleukin 1 receptor antagonist                                                             |
| 1425493_at   | 4.88  | 7.037  | 5.686 | 6.459  | 7.579  | 2.471 | Bmpr1a   | bone morphogenetic protein receptor, type 1A                                                  |
| 1431057_a_at | 3.92  | 6.542  | 4.377 | 5.125  | 5.427  | 2.467 | Prss23   | protease, serine, 23                                                                          |
| 1426191_a_at | 4.5   | 6.838  | 6.509 | 4.38   | 6.509  | 2.458 | Bcl2l1   | Bcl2-like 1                                                                                   |
| 1434180_at   | 5.72  | 7.553  | 5.634 | 6.661  | 7.195  | 2.453 | Plekhc1  | pleckstrin homology domain containing, family C (with FERM domain) member 1                   |
| 1435383_x_at | 6.66  | 9.734  | 7.530 | 8.028  | 8.262  | 2.438 | Ndn      | necdin                                                                                        |
| 1426464_at   | 5.34  | 8.204  | 5.697 | 6.135  | 6.055  | 2.427 | Nr1d1    | nuclear receptor subfamily 1, group D, member 1                                               |
| 1418664_at   | 4.8   | 7.856  | 5.402 | 5.779  | 5.752  | 2.427 | Mpdz     | multiple PDZ domain protein                                                                   |
| 1452595_at   | 4.8   | 9.778  | 7.557 | 7.796  | 7.999  | 2.424 | Adamts4  | thrombospondin type 1 motif, 4                                                                |
| 1424667_a_at | 3.38  | 5.828  | 5.484 | 4.692  | 6.771  | 2.423 | Cutl1    | cut-like 1 (Drosophila)                                                                       |
| 1448696_at   | 8.40  | 7.922  | 4.841 | 5.527  | 4.867  | 2.421 | Heph     | hephaestin                                                                                    |
| 1427986_a_at | 3.38  | 4.868  | 4.35  | 4.868  | 6.758  | 2.408 | Col16a1  | procollagen, type XVI, alpha 1                                                                |
| 1425575_at   | 2.43  | 5.265  | 3.951 | 4.065  | 5.141  | 2.39  | Epha3    | Eph receptor A3                                                                               |
| 1427257_at   | 4.6   | 6.263  | 4.642 | 4.729  | 5.497  | 2.389 | Cspg2    | chondroitin sulfate proteoglycan 2                                                            |
| 1450798_at   | 5.34  | 7.286  | 4.914 | 5.109  | 5.109  | 2.372 | Tnxb     | tenascin XB                                                                                   |
| 1448469_at   | 2.12  | 6.908  | 4.58  | 4.709  | 4.751  | 2.37  | Nid1     | nidogen 1                                                                                     |
| 1422180_a_at | 6.51  | 7.007  | 4.644 | 5.267  | 5.267  | 2.363 | Mcpt6    | mast cell protease 6                                                                          |
| 1431505_at   | 5.45  | 4.202  | 3.779 | 4.535  | 6.469  | 2.357 | Ppih     | peptidyl prolyl isomerase H                                                                   |
| 1451689_a_at | 10.49 | 5.225  | 4.008 | 8.524  | 9.662  | 2.355 | Sox10    | SRY-box containing gene 10                                                                    |
| 1416630_at   | 3.71  | 6.884  | 5.069 | 5.341  | 5.88   | 2.354 | Id3      | inhibitor of DNA binding 3                                                                    |
| 1455792_x_at | 6.66  | 10.328 | 8.105 | 8.648  | 8.767  | 2.342 | Ndn      | necdin                                                                                        |
| 1417281_a_at | 5.86  | 8.193  | 6.120 | 6.752  | 7.012  | 2.333 | Mmp23    | matrix metalloproteinase 23                                                                   |
| 1452124_at   | 2.12  | 4.843  | 4.42  | 4.843  | 6.75   | 2.33  | 2900054D | ankyrin 3, epithelial /// RIKEN cDNA 2900054D09 gene                                          |
| 1424576_s_at | 2.75  | 6.308  | 4.646 | 5.036  | 5.702  | 2.328 | Cyp2c44  | cytochrome P450, family 2, subfamily c, polypeptide 44                                        |
| 1450009_at   | 10.49 | 5.867  | 4.519 | 9.531  | 10.511 | 2.328 | Ltf      | lactotransferrin                                                                              |
| 1423104_at   | 4.88  | 8.729  | 7.15  | 7.211  | 7.958  | 2.326 | Irs1     | insulin receptor substrate 1                                                                  |
| 1433966_x_at | 7.62  | 7.712  | 7.026 | 7.780  | 9.419  | 2.325 | Asns     | asparagine synthetase                                                                         |
| 1419709_at   | 7.36  | 5.441  | 4.897 | 5.175  | 6.950  | 2.319 | Stfa3    | stefin A3                                                                                     |
| 1421374_a_at | 6.06  | 8.758  | 6.747 | 6.276  | 6.584  | 2.319 | Fxyd1    | FXID domain-containing ion transport regulator 1                                              |
| 1426955_at   | 7.36  | 7.025  | 5.444 | 5.770  | 6.507  | 2.318 | Col18a1  | procollagen, type XVIII, alpha 1                                                              |
| 1449368_at   | 9.44  | 11.850 | 9.240 | 9.792  | 9.498  | 2.316 | Dcn      | decorin                                                                                       |
| 1423885_at   | 5.34  | 9.557  | 7.338 | 7.205  | 7.297  | 2.311 | Lamc1    | laminin, gamma 1                                                                              |
| 1438211_s_at | 5.34  | 11.432 | 8.774 | 8.728  | 8.352  | 2.282 | Dbp      | D site albumin promoter binding protein                                                       |
| 1434436_at   | 8.40  | 9.096  | 7.803 | 7.356  | 8.334  | 2.271 | Morc4    | microorchidia 4                                                                               |
| 1425958_at   | 5.86  | 5.699  | 4.609 | 4.136  | 5.315  | 2.269 | Il1f9    | interleukin 1 family, member 9                                                                |
| 1424218_a_at | 3.44  | 4.662  | 4.248 | 3.973  | 5.825  | 2.266 | Creb3l4  | cAMP responsive element binding protein 3-like 4                                              |
| 1418063_at   | 3.38  | 5.879  | 3.791 | 3.614  | 3.791  | 2.265 | Kera     | keratocan                                                                                     |
| 1448169_at   | 10.49 | 7.912  | 6.405 | 10.962 | 11.708 | 2.253 | Krt1-18  | keratin complex 1, acidic, gene 18                                                            |
| 1426285_at   | 7.62  | 8.964  | 6.584 | 7.304  | 7.177  | 2.253 | Lama2    | laminin, alpha 2                                                                              |
| 1451047_at   | 6.33  | 6.386  | 4.735 | 4.335  | 4.935  | 2.251 | Itn2a    | integral membrane protein 2A                                                                  |

| Probe set    | NLP   | D.WT   | D.E2   | T.WT   | T.E2   | INT   | Gene        | Gene information                                                                                               |
|--------------|-------|--------|--------|--------|--------|-------|-------------|----------------------------------------------------------------------------------------------------------------|
| 1423691_x_at | 10.49 | 5.875  | 4.766  | 9.806  | 10.947 | 2.250 | Krt2-8      | keratin complex 2, basic, gene 8                                                                               |
| 1451858_at   | 8.40  | 7.619  | 6.470  | 5.824  | 6.920  | 2.245 | Mrgpra2     | MAS-related GPR, member A2                                                                                     |
| 1416872_at   | 4.88  | 6.248  | 4.843  | 4.738  | 5.578  | 2.245 | Tspan6      | tetraspanin 6                                                                                                  |
| 1418494_at   | 4.88  | 7.799  | 5.818  | 5.39   | 5.649  | 2.24  | Ebf2        | early B-cell factor 2                                                                                          |
| 1423311_s_at | 5.82  | 7.873  | 6.018  | 6.245  | 6.625  | 2.235 | Tpbp        | trophoblast glycoprotein                                                                                       |
| 1429052_at   | 5.34  | 7.736  | 5.357  | 5.497  | 5.352  | 2.234 | Ptprd       | protein tyrosine phosphatase, receptor type, D                                                                 |
| 1418745_at   | 3.92  | 6.748  | 4.371  | 4.735  | 4.585  | 2.227 | Omd         | osteomodulin                                                                                                   |
| 1448326_a_at | 4.59  | 5.42   | 4.807  | 4.732  | 6.334  | 2.215 | Crabp1      | cellular retinoic acid binding protein I                                                                       |
| 1448485_at   | 3.71  | 5.159  | 4.855  | 4.529  | 6.422  | 2.197 | Ggt1        | gamma-glutamyltransferase 1                                                                                    |
| 1421734_at   | 4.88  | 8.208  | 7.091  | 6.975  | 8.045  | 2.187 | Il8rb       | interleukin 8 receptor, beta                                                                                   |
| 1417602_at   | 6.33  | 9.088  | 5.769  | 6.368  | 5.233  | 2.184 | Per2        | period homolog 2 (Drosophila)                                                                                  |
| 1439388_s_at | 4.88  | 5.392  | 4.625  | 4.566  | 5.982  | 2.183 | Bcar1       | breast cancer anti-estrogen resistance 1                                                                       |
| 1455007_s_at | 8.39  | 10.757 | 8.590  | 8.590  | 8.590  | 2.167 | Gpt2        | glutamic pyruvate transaminase (alanine aminotransferase) 2                                                    |
| 1437853_x_at | 6.29  | 10.603 | 8.639  | 9.163  | 9.364  | 2.165 | Ndn         | necdin                                                                                                         |
| 1418106_at   | 2.97  | 4.522  | 4.064  | 4.132  | 5.832  | 2.158 | Hey2        | hairly/enhancer-of-split related with YRPW motif 2                                                             |
| 1419662_at   | 5.34  | 8.347  | 5.928  | 5.942  | 5.681  | 2.158 | Ogn         | osteoglycin                                                                                                    |
| 1420413_at   | 3.44  | 7.904  | 6.686  | 6.563  | 7.5    | 2.155 | Slc7a11     | 11                                                                                                             |
| 1427048_at   | 2.97  | 4.665  | 3.888  | 3.728  | 5.105  | 2.154 | Smo         | smoothened homolog (Drosophila)                                                                                |
| 1426571_at   | 3.92  | 4.395  | 4.125  | 4.648  | 6.532  | 2.154 | Tmem16a     | transmembrane protein 16A                                                                                      |
| 1422561_at   | 7.88  | 6.539  | 4.181  | 4.830  | 4.612  | 2.140 | Adamts5     | a disintegrin-like and metalloproteinase (reprolysin type) with thrombospondin type 1 motif, 5 (aggrecanase-2) |
| 1427884_at   | 7.88  | 11.704 | 9.753  | 10.052 | 10.238 | 2.137 | Col3a1      | procollagen, type III, alpha 1                                                                                 |
| 1427302_at   | 3.71  | 4.341  | 4.286  | 4.469  | 6.545  | 2.131 | Enpp3       | ectonucleotide pyrophosphatase/phosphodiesterase 3                                                             |
| 1421473_at   | 5.86  | 9.673  | 8.222  | 8.917  | 9.597  | 2.131 | Il1a        | interleukin 1 alpha                                                                                            |
| 1427038_at   | 8.59  | 7.504  | 5.375  | 5.375  | 5.375  | 2.129 | Penk1       | preproenkephalin 1                                                                                             |
| 1418488_s_at | 9.44  | 5.793  | 4.545  | 8.190  | 9.070  | 2.128 | Ripk4       | receptor-interacting serine-threonine kinase 4                                                                 |
| 1416589_at   | 7.39  | 10.621 | 8.564  | 9.275  | 9.341  | 2.123 | Sparc       | secreted acidic cysteine rich glycoprotein                                                                     |
| 1421811_at   | 10.49 | 11.302 | 10.036 | 8.099  | 8.956  | 2.123 | Thbs1       | thrombospondin 1                                                                                               |
| 1419532_at   | 8.91  | 9.623  | 8.440  | 7.954  | 8.890  | 2.119 | Il1r2       | interleukin 1 receptor, type II                                                                                |
| 1419394_s_at | 9.44  | 12.497 | 11.867 | 11.317 | 12.803 | 2.116 | S100a8      | S100 calcium binding protein A8 (calgranulin A)                                                                |
| 1451866_a_at | 3.68  | 5.005  | 4.578  | 4.007  | 5.694  | 2.114 | Hgf         | hepatocyte growth factor                                                                                       |
| 1420443_at   | 3.44  | 4.78   | 3.812  | 3.884  | 5.027  | 2.111 | Pcdhb19     | protocadherin beta 19                                                                                          |
| 1417566_at   | 3.92  | 6.676  | 6.131  | 6.318  | 7.879  | 2.106 | Abhd5       | abhydrolase domain containing 5                                                                                |
| 1460371_at   | 2.51  | 6.386  | 4.458  | 5.049  | 5.226  | 2.105 | Hspa12b     | heat shock protein 12B                                                                                         |
| 1435989_x_at | 8.65  | 5.431  | 4.165  | 9.559  | 10.396 | 2.103 | LOC434261   | similar to cytokeratin EndoA - mouse                                                                           |
| 1426238_at   | 2.97  | 5.563  | 4.163  | 4.522  | 5.224  | 2.102 | Bmp1        | bone morphogenetic protein 1                                                                                   |
| 1416652_at   | 4.88  | 8.253  | 5.945  | 6.329  | 6.111  | 2.09  | Aspn        | asporin                                                                                                        |
| 1422760_at   | 6.87  | 7.761  | 6.547  | 4.684  | 5.56   | 2.09  | Padi4       | peptidyl arginine deiminase, type IV                                                                           |
| 1415923_at   | 6.87  | 6.971  | 5.315  | 5.237  | 5.668  | 2.087 | Ndn         | necdin                                                                                                         |
| 1427363_at   | 6.33  | 6.25   | 5.096  | 4.127  | 5.058  | 2.085 | Myo10       | Myosin X, mRNA (cDNA clone IMAGE:3969479)                                                                      |
| 1424131_at   | 7.88  | 9.488  | 8.134  | 7.908  | 8.63   | 2.076 | Col6a3      | procollagen, type VI, alpha 3                                                                                  |
| 1448931_at   | 5.86  | 4.975  | 4.941  | 5.475  | 7.513  | 2.072 | F2r1        | coagulation factor II (thrombin) receptor-like 1                                                               |
| 1450924_at   | 6.33  | 6.567  | 5.695  | 4.254  | 5.452  | 2.07  | Hdgfrp3     | hepatoma-derived growth factor, related protein 3                                                              |
| 1417129_a_at | 3.38  | 6.988  | 5.005  | 4.931  | 5.005  | 2.057 | Mrg1        | myeloid ecotropic viral integration site-related gene 1                                                        |
| 1435382_at   | 6.66  | 9.597  | 7.43   | 7.945  | 7.821  | 2.043 | Ndn         | necdin                                                                                                         |
| 1418764_a_at | 2.97  | 4.971  | 4.45   | 4.303  | 5.823  | 2.041 | Bpnt1       | bisphosphate 3'-nucleotidase 1                                                                                 |
| 1448997_at   | 2.51  | 5.189  | 4.151  | 3.84   | 4.841  | 2.039 | Pscd1       | pleckstrin homology, Sec7 and coiled-coil domains 1                                                            |
| 1435035_at   | 3.92  | 6.805  | 5.941  | 5.36   | 6.524  | 2.028 | Rg9mt2      | RNA (guanine-9-) methyltransferase domain containing 2                                                         |
| 1437913_at   | 5.72  | 7.526  | 7.119  | 5.698  | 7.314  | 2.023 | Bcl2a1b /// | leukemia/lymphoma 2 related protein A1b /// B-cell leukemia/lymphoma 2                                         |
| 1450658_at   | 2.51  | 7.369  | 5.357  | 5.357  | 5.357  | 2.012 | Adamts5     | thrombospondin type 1 motif, 5 (aggrecanase-2)                                                                 |
| 1448756_at   | 7.65  | 12.819 | 12.284 | 11.508 | 12.983 | 2.01  | S100a9      | S100 calcium binding protein A9 (calgranulin B)                                                                |
| 1454681_at   | 10.49 | 6.022  | 4.991  | 9.489  | 10.467 | 2.009 | Rbm35a      | RNA binding motif protein 35A                                                                                  |



| Probe set    | NLP   | D.WT   | D.E2   | T.WT   | T.E2   | INT   | Gene     | Gene information                                                               |
|--------------|-------|--------|--------|--------|--------|-------|----------|--------------------------------------------------------------------------------|
| 1448309_at   | 3.61  | 6.947  | 6.735  | 4.553  | 6.346  | 2.005 | Ap3m1    | adaptor-related protein complex 3, mu 1 subunit                                |
| 1423428_at   | 2.97  | 6.914  | 4.901  | 4.981  | 4.968  | 2     | Ror2     | receptor tyrosine kinase-like orphan receptor 2                                |
| 1452349_x_at | 7.88  | 9.765  | 8.003  | 8.423  | 8.652  | 1.991 | Mnda     | interferon activated gene 205 /// myeloid cell nuclear differentiation antigen |
| 1420577_at   | 3.68  | 5.647  | 5.138  | 4.649  | 6.119  | 1.979 | Aicda    | activation-induced cytidine deaminase                                          |
| 1438714_at   | 6.66  | 6.356  | 6.053  | 3.74   | 5.416  | 1.979 | Zfp207   | Zinc finger protein 207, mRNA (cDNA clone MGC:5714 IMAGE:3601357)              |
| 1416741_at   | 5.34  | 6.736  | 4.76   | 4.76   | 4.76   | 1.976 | Col5a1   | Procollagen, type V, alpha 1 (Col5a1), mRNA                                    |
| 1423566_a_at | 6.41  | 9.272  | 7.282  | 6.856  | 6.837  | 1.971 | Hsp110   | heat shock protein 110                                                         |
| 1439210_at   | 4.81  | 6.455  | 6.192  | 4.352  | 6.053  | 1.964 | Mrps9    | mitochondrial ribosomal protein S9                                             |
| 1417732_at   | 2.97  | 3.97   | 4.133  | 4.412  | 6.537  | 1.962 | Anxa8    | annexin A8                                                                     |
| 1418511_at   | 8.91  | 12.024 | 9.948  | 10.188 | 10.072 | 1.96  | Dpt      | dermatopontin                                                                  |
| 1424714_at   | 4.04  | 5.125  | 4.095  | 4.496  | 5.42   | 1.954 | Aldoc    | aldolase 3, C isoform                                                          |
| 1454206_a_at | 2.06  | 5.494  | 4.575  | 4.359  | 5.39   | 1.95  | Adam15   | a disintegrin and metallopeptidase domain 15 (metargidin)                      |
| 1416564_at   | 2.51  | 6.184  | 4.981  | 5.245  | 5.989  | 1.947 | Sox7     | SRY-box containing gene 7                                                      |
| 1418678_at   | 5.34  | 6.266  | 4.282  | 4.255  | 4.215  | 1.944 | Has2     | hyaluronan synthase 2                                                          |
| 1420558_at   | 6.5   | 7.953  | 7.312  | 6.527  | 7.827  | 1.941 | Selp     | selectin, platelet                                                             |
| 1438841_s_at | 10.49 | 8.941  | 7.822  | 7.315  | 8.132  | 1.936 | Arg2     | arginase type II                                                               |
| 1417487_at   | 5.34  | 6.815  | 4.883  | 5.005  | 5.005  | 1.932 | Fosl1    | fos-like antigen 1                                                             |
| 1442484_at   | 3.38  | 6.489  | 6.489  | 4.337  | 6.264  | 1.927 | e        | DNA segment, Chr 9, ERATO Doi 306, expressed                                   |
| 1423274_at   | 5.34  | 7.352  | 5.569  | 5.784  | 5.927  | 1.926 | Ddx26    | DEAD/H (Asp-Glu-Ala-Asp/His) box polypeptide 26                                |
| 1422305_at   | 5.34  | 7.768  | 5.524  | 5.074  | 4.756  | 1.926 | Ifnb1    | interferon beta 1, fibroblast                                                  |
| 1426170_a_at | 6.33  | 5.94   | 4.761  | 4.406  | 5.15   | 1.923 | Cd8b1    | CD8 antigen, beta chain 1                                                      |
| 1449037_at   | 7.88  | 10.69  | 8.762  | 8.345  | 8.338  | 1.921 | CreM     | cAMP responsive element modulator                                              |
| 1427673_a_at | 3.92  | 5.458  | 3.656  | 3.942  | 4.056  | 1.916 | Sema3e   | (semaphorin) 3E                                                                |
| 1448507_at   | 6.87  | 10.81  | 8.467  | 8.733  | 8.289  | 1.899 | Efhd1    | EF hand domain containing 1                                                    |
| 1418981_at   | 1.39  | 4.995  | 4.217  | 4.268  | 5.388  | 1.898 | Casp12   | caspace 12                                                                     |
| 1424308_at   | 3.44  | 5.709  | 4.293  | 3.998  | 4.47   | 1.888 | Slc24a3  | solute carrier family 24 (sodium/potassium/calcium exchanger), member 3        |
| 1424486_a_at | 4.88  | 7.155  | 5.626  | 4.942  | 5.298  | 1.885 | Txnrd1   | thioredoxin reductase 1                                                        |
| 1453839_a_at | 10.49 | 10.573 | 8.715  | 8.766  | 8.785  | 1.877 | Pi16     | peptidase inhibitor 16                                                         |
| 1420887_a_at | 3.71  | 5.93   | 5.882  | 4.822  | 6.649  | 1.875 | Bcl2l1   | Bcl2-like 1                                                                    |
| 1427126_at   | 10.49 | 9.398  | 9.293  | 6.897  | 8.666  | 1.874 | Hspa1a   | heat shock protein 1A                                                          |
| 1423852_at   | 6.87  | 5.827  | 6.035  | 6.325  | 8.404  | 1.871 | Tmem46   | transmembrane protein 46                                                       |
| 1423475_at   | 2.75  | 6.329  | 5.024  | 4.971  | 5.536  | 1.87  | Cnnm2    | cyclin M2                                                                      |
| 1447631_at   | 3.71  | 5.525  | 4.798  | 4.316  | 5.459  | 1.87  | Myst2    | MYST histone acetyltransferase 2                                               |
| 1422870_at   | 3.92  | 7.175  | 5.542  | 5.145  | 5.381  | 1.869 | Hoxc4    | homeo box C4                                                                   |
| 1450144_at   | 3.71  | 6.136  | 4.473  | 4.704  | 4.897  | 1.856 | Pla2g1br | phospholipase A2, group IB, pancreas, receptor                                 |
| 1426519_at   | 8.4   | 7.891  | 7.136  | 6.03   | 7.129  | 1.854 | P4ha1    | alpha 1 polypeptide                                                            |
| 1438527_at   | 4.81  | 7.194  | 6.838  | 6.021  | 7.507  | 1.842 | LOC24451 | Ribosomal protein L3 /// similar to 60S ribosomal protein L3 (L4) /// similar  |
| 1420331_at   | 10.49 | 9.598  | 8.433  | 7.551  | 8.207  | 1.821 | Clec4e   | C-type lectin domain family 4, member e                                        |
| 1449901_a_at | 6.33  | 7.419  | 5.66   | 5.525  | 5.581  | 1.815 | Map3k6   | mitogen-activated protein kinase kinase kinase 6                               |
| 1453920_a_at | 2.97  | 5.74   | 5.018  | 4.77   | 5.863  | 1.815 | Mospd2   | motile sperm domain containing 2                                               |
| 1448416_at   | 10.49 | 7.92   | 6.713  | 10.248 | 10.854 | 1.813 | Mgp      | matrix Gla protein                                                             |
| 1419735_at   | 10.49 | 7.768  | 6.499  | 12.416 | 12.956 | 1.809 | Csnk     | casein kappa                                                                   |
| 1419524_at   | 3.38  | 6.071  | 4.378  | 4.378  | 4.494  | 1.809 | Tph1     | tryptophan hydroxylase 1                                                       |
| 1427870_x_at | 3.96  | 3.625  | 4.042  | 4.043  | 6.262  | 1.802 | Igh-4    | immunoglobulin heavy chain 4 (serum IgG1)                                      |
| 1432115_a_at | 2.74  | 5.941  | 5.592  | 4.488  | 5.931  | 1.792 | Pign     | phosphatidylinositol glycan, class N                                           |
| 1454713_s_at | 10.49 | 9.042  | 7.962  | 7.084  | 7.794  | 1.79  | Hdc      | histidine decarboxylase                                                        |
| 1423915_at   | 1.82  | 5.879  | 4.48   | 4.122  | 4.505  | 1.782 | Olfml2b  | olfactomedin-like 2B                                                           |
| 1417500_a_at | 10.49 | 9.658  | 8.457  | 8.243  | 8.822  | 1.78  | Tgm2     | transglutaminase 2, C polypeptide                                              |
| 1438957_x_at | 10.49 | 8.38   | 7.03   | 7.163  | 7.591  | 1.778 | Cds2     | CDP-diacylglycerol synthase (phosphatidate cytidyltransferase) 2               |
| 1423952_a_at | 6.33  | 5.733  | 4.241  | 7.727  | 8.013  | 1.778 | Krt2-7   | keratin complex 2, basic, gene 7                                               |
| 1448990_a_at | 3.44  | 5.603  | 4.631  | 4.508  | 5.313  | 1.777 | Myo1b    | myosin IB                                                                      |
| 1448529_at   | 6.41  | 12.271 | 10.762 | 10.477 | 10.743 | 1.775 | Thbd     | thrombomodulin                                                                 |

| Probe set    | NLP   | D.WT   | D.E2   | T.WT   | T.E2   | INT   | Gene     | Gene information                                                      |
|--------------|-------|--------|--------|--------|--------|-------|----------|-----------------------------------------------------------------------|
| 1428283_at   | 3.92  | 4.761  | 4.452  | 4.234  | 5.691  | 1.766 | Cyp2s1   | cytochrome P450, family 2, subfamily s, polypeptide 1                 |
| 1451951_at   | 1.82  | 4.395  | 4.684  | 4.597  | 6.649  | 1.763 | Igk-V8   | Immunoglobulin light chain variable region (IGLV gene), clone F22-4   |
| 1455209_at   | 2.74  | 4.589  | 3.767  | 3.734  | 4.673  | 1.761 | Pck1     | MGC:46881 IMAGE:4973187)                                              |
| 1451939_a_at | 2.97  | 5.934  | 4.39   | 4.472  | 4.688  | 1.76  | Srpx     | sushi-repeat-containing protein                                       |
| 1454959_s_at | 3.71  | 6.603  | 5.013  | 4.814  | 4.977  | 1.753 | Gnai1    | guanine nucleotide binding protein, alpha inhibiting 1                |
| 1421407_at   | 5.73  | 5.995  | 5.725  | 4.932  | 6.414  | 1.752 | F2r12    | coagulation factor II (thrombin) receptor-like 2                      |
| 1420330_at   | 10.49 | 10.654 | 9.496  | 8.739  | 9.328  | 1.747 | Clec4e   | C-type lectin domain family 4, member e                               |
| 1427711_a_at | 4.6   | 6.377  | 5.633  | 5.263  | 6.262  | 1.743 | Ceacam1  | CEA-related cell adhesion molecule 1                                  |
| 1423573_at   | 4.88  | 6.282  | 5.404  | 5.144  | 6.005  | 1.739 | Srd5a2l  | steroid 5 alpha-reductase 2-like                                      |
| 1449271_a_at | 7.39  | 7.646  | 8.285  | 6.428  | 8.802  | 1.735 | Hebp2    | heme binding protein 2                                                |
| 1418589_a_at | 4.88  | 5.5    | 4.695  | 4.215  | 5.14   | 1.73  | Mlf1     | myeloid leukemia factor 1                                             |
| 1429086_at   | 2.97  | 4.868  | 4.959  | 5.042  | 6.857  | 1.724 | Grhl2    | grainyhead-like 2 (Drosophila)                                        |
| 1426230_at   | 7.36  | 8.837  | 6.647  | 6.325  | 5.854  | 1.719 | Sphk2    | sphingosine kinase 2                                                  |
| 1442566_at   | 4.88  | 7.692  | 6.423  | 5.87   | 6.317  | 1.716 | C78878   | expressed sequence C78878                                             |
| 1431691_a_at | 5.45  | 9.989  | 10.141 | 7.874  | 9.737  | 1.711 | Rab31    | RAB31, member RAS oncogene family                                     |
| 1421493_a_at | 3.68  | 4.96   | 4.015  | 3.959  | 4.721  | 1.707 | Rgs20    | regulator of G-protein signaling 20                                   |
| 1450863_a_at | 2.75  | 5.347  | 4.212  | 4.227  | 4.798  | 1.706 | Dcamk1l  | double cortin and calcium/calmodulin-dependent protein kinase-like 1  |
| 1437354_at   | 3.02  | 5.836  | 5.471  | 3.978  | 5.315  | 1.702 | 08Rik    | RIKEN cDNA C230091D08 gene                                            |
| 1419088_at   | 2.51  | 5.263  | 3.839  | 3.99   | 4.263  | 1.697 | Timp3    | tissue inhibitor of metalloproteinase 3                               |
| 1423607_at   | 5.34  | 8.045  | 6.315  | 6.419  | 6.385  | 1.696 | Lum      | lumican                                                               |
| 1451160_s_at | 6.66  | 11.408 | 10.134 | 9.814  | 10.235 | 1.695 | Pvr      | poliovirus receptor                                                   |
| 1451270_at   | 5.34  | 7.336  | 6.009  | 5.644  | 6.009  | 1.692 | Dusp18   | dual specificity phosphatase 18                                       |
| 1451060_at   | 2.97  | 5.343  | 3.981  | 4.074  | 4.403  | 1.691 | Gpr146   | G protein-coupled receptor 146                                        |
| 1422857_at   | 3.44  | 5.655  | 6.111  | 4.638  | 6.78   | 1.686 | Trip4    | thyroid hormone receptor interactor 4                                 |
| 1448481_at   | 4.5   | 6.419  | 6.194  | 4.839  | 6.293  | 1.679 | Neu1     | neuraminidase 1                                                       |
| 1456003_a_at | 5.72  | 7.654  | 7.459  | 7.078  | 8.56   | 1.677 | Slc1a4   | 4                                                                     |
| 1450388_s_at | 5.13  | 10.064 | 9.289  | 8.773  | 9.673  | 1.675 | Twsg1    | twisted gastrulation homolog 1 (Drosophila)                           |
| 1449629_s_at | 3.02  | 7.416  | 6.566  | 6.676  | 7.5    | 1.674 | Snrpd3   | IMAGE:3256792)                                                        |
| 1420804_s_at | 10.49 | 12.158 | 11.038 | 11.199 | 11.753 | 1.674 | Clec4d   | C-type lectin domain family 4, member d                               |
| 1438661_a_at | 4.97  | 6.41   | 5.023  | 5.154  | 5.436  | 1.669 | Arf2     | ADP-ribosylation factor 2                                             |
| 1431981_at   | 4.88  | 6.227  | 4.907  | 4.402  | 4.743  | 1.661 | Hif1a    | hypoxia inducible factor 1, alpha subunit                             |
| 1449740_s_at | 10.49 | 6.475  | 5.294  | 9.207  | 9.687  | 1.661 | Dsg2     | desmoglein 2                                                          |
| 1452001_at   | 6.33  | 6.743  | 5.343  | 4.972  | 5.225  | 1.653 | Nfe2     | nuclear factor, erythroid derived 2                                   |
| 1421394_a_at | 2.74  | 5.877  | 4.638  | 4.241  | 4.654  | 1.652 | Birc4    | baculoviral IAP repeat-containing 4                                   |
| 1425811_a_at | 3.68  | 6.587  | 5.486  | 5.632  | 6.18   | 1.649 | Csrp1    | cysteine and glycine-rich protein 1                                   |
| 1417408_at   | 3.61  | 5.757  | 5.502  | 4.862  | 6.254  | 1.647 | F3       | coagulation factor III                                                |
| 1434745_at   | 10.49 | 10.622 | 9.873  | 8.816  | 9.712  | 1.645 | Ccnd2    | Cyclin D2 (Ccnd2), mRNA                                               |
| 1423597_at   | 1.87  | 5.369  | 4.336  | 4.385  | 4.991  | 1.639 | Atp8a1   | 1                                                                     |
| 1425458_a_at | 5.34  | 10.746 | 9.221  | 8.982  | 9.095  | 1.638 | Grb10    | growth factor receptor bound protein 10                               |
| 1459911_at   | 6.87  | 8.195  | 7.098  | 6.792  | 7.327  | 1.632 | 24Rik    | RIKEN cDNA D030068L24 gene                                            |
| 1426720_at   | 2.51  | 4.01   | 3.747  | 3.798  | 5.165  | 1.63  | Apbb2    | amyloid beta (A4) precursor protein-binding, family B, member 2       |
| 1449993_at   | 2.51  | 5.388  | 5.001  | 4.812  | 6.049  | 1.624 | AF119384 | cDNA sequence AF119384                                                |
| 1449741_at   | 10.49 | 7.076  | 6.035  | 9.421  | 10     | 1.62  | Dsg2     | Desmoglein 2 (Dsg2), mRNA                                             |
| 1417069_a_at | 4.81  | 7.531  | 7.257  | 5.814  | 7.157  | 1.617 | Gmfb     | glia maturation factor, beta                                          |
| 1417884_at   | 4.44  | 8.346  | 7.713  | 7.275  | 8.253  | 1.611 | Slc16a6  | solute carrier family 16 (monocarboxylic acid transporters), member 6 |
| 1423393_at   | 10.49 | 11.964 | 10.916 | 9.962  | 10.522 | 1.608 | Clic4    | chloride intracellular channel 4 (mitochondrial)                      |
| 1429301_at   | 2.74  | 6.439  | 5.758  | 4.831  | 5.758  | 1.608 | Csnk2a2  | casein kinase II, alpha 2, polypeptide                                |
| 1427127_x_at | 8.91  | 9.987  | 9.737  | 8.022  | 9.373  | 1.601 | Hspa1a   | heat shock protein 1A                                                 |
| 1416398_at   | 3.71  | 7.635  | 6.404  | 5.709  | 6.077  | 1.599 | Mesdc1   | mesoderm development candidate 1                                      |
| 1416958_at   | 6.66  | 11.352 | 9.487  | 9.352  | 9.086  | 1.599 | Nr1d2    | nuclear receptor subfamily 1, group D, member 2                       |
| 1424077_at   | 4.88  | 7.377  | 6.25   | 5.357  | 5.825  | 1.595 | Gdpd1    | glycerophosphodiester phosphodiesterase domain containing 1           |
| 1416773_at   | 8.59  | 9.397  | 7.803  | 7.803  | 7.803  | 1.594 | Wee1     | wee 1 homolog (S. pombe)                                              |



| Probe set    | NLP   | D.WT   | D.E2   | T.WT   | T.E2   | INT    | Gene     | Gene information                                                     |
|--------------|-------|--------|--------|--------|--------|--------|----------|----------------------------------------------------------------------|
| 1417263_at   | 6.33  | 6.537  | 5.21   | 5.015  | 5.281  | 1.593  | Ptgs2    | prostaglandin-endoperoxide synthase 2                                |
| 1432027_a_at | 4.88  | 6.065  | 4.981  | 4.832  | 5.336  | 1.588  | Tbc1d14  | TBC1 domain family, member 14                                        |
| 1420833_at   | 3.02  | 6.988  | 6.594  | 6.352  | 7.538  | 1.58   | Vamp2    | vesicle-associated membrane protein 2                                |
| 1424453_at   | 5.86  | 5.548  | 5.078  | 3.773  | 4.876  | 1.573  | Pcy1a    | phosphate cytidyltransferase 1, choline, alpha isoform               |
| 1426314_at   | 6.87  | 8.35   | 7.921  | 6.578  | 7.72   | 1.571  | Ednrb    | endothelin receptor type B                                           |
| 1417461_at   | 10.49 | 5.58   | 5.122  | 8.62   | 9.73   | 1.568  | Cap1     | CAP, adenylate cyclase-associated protein 1 (yeast)                  |
| 1418090_at   | 6.33  | 6.214  | 5.897  | 5.708  | 6.954  | 1.563  | Plvap    | plasmalemma vesicle associated protein                               |
| 1421786_at   | 6.33  | 6.659  | 6.01   | 5.448  | 6.361  | 1.562  | Ppp3r1   | type I)                                                              |
| 1421114_a_at | 2.97  | 5.548  | 3.907  | 3.855  | 3.769  | 1.555  | Dspg3    | dermatan sulphate proteoglycan 3                                     |
| 1437543_at   | 5.34  | 8.493  | 8.284  | 6.311  | 7.655  | 1.553  | Fubp1    | far upstream element (FUSE) binding protein 1                        |
| 1418350_at   | 5.45  | 9.082  | 7.426  | 7.095  | 6.989  | 1.55   | Hbegf    | heparin-binding EGF-like growth factor                               |
| 1418665_at   | 6.33  | 7.563  | 7.548  | 7.147  | 8.677  | 1.545  | Impa2    | inositol (myo)-1(or 4)-monophosphatase 2                             |
| 1416579_a_at | 10.49 | 5.843  | 4.747  | 8.384  | 8.829  | 1.541  | Tacstd1  | tumor-associated calcium signal transducer 1                         |
| 1418382_at   | 5.34  | 6.031  | 4.84   | 4.614  | 4.963  | 1.54   | Apcdd1   | adenomatosis polyposis coli down-regulated 1                         |
| 1438978_x_at | 2.51  | 5.468  | 4.073  | 3.954  | 4.097  | 1.538  | Ndn      | neudin                                                               |
| 1427265_at   | 5.34  | 4.591  | 4.081  | 3.566  | 4.591  | 1.535  | Bcr      | breakpoint cluster region homolog                                    |
| 1425652_s_at | 2.74  | 5.914  | 5.334  | 5.201  | 6.151  | 1.53   | Rbpms    | RNA binding protein gene with multiple splicing                      |
| 1450871_a_at | 6.68  | 9.711  | 8.587  | 7.796  | 8.2    | 1.528  | Bcat1    | branched chain aminotransferase 1, cytosolic                         |
| 1418349_at   | 8.59  | 10.466 | 8.698  | 8.539  | 8.299  | 1.528  | Hbegf    | heparin-binding EGF-like growth factor                               |
| 1419978_s_at | 2.28  | 5.837  | 4.62   | 4.533  | 4.843  | 1.527  | Oe       | DNA segment, Chr 10, ERATO Doi 610, expressed                        |
| 1436392_s_at | 10.49 | 6.271  | 5.221  | 9.709  | 10.182 | 1.523  | Tcfap2c  | transcription factor AP-2, gamma                                     |
| 1450861_at   | 3.38  | 6.084  | 4.618  | 4.52   | 4.577  | 1.523  | Fancc    | Fanconi anemia, complementation group C                              |
| 1424157_at   | 6.51  | 9.17   | 8.143  | 7.457  | 7.952  | 1.522  | Ehd2     | EH-domain containing 2                                               |
| 1418156_at   | 3.38  | 6.115  | 4.785  | 4.596  | 4.785  | 1.519  | Kcne4    | potassium voltage-gated channel, Isk-related subfamily, gene 4       |
| 1450209_at   | 2.74  | 5.354  | 4.412  | 4.387  | 4.96   | 1.515  | Hoxd4    | homeo box D4                                                         |
| 1452363_a_at | 6.66  | 8.343  | 7.63   | 7.201  | 7.999  | 1.511  | Atp2a2   | ATPase, Ca <sup>++</sup> transporting, cardiac muscle, slow twitch 2 |
| 1427317_at   | 9.44  | 7.087  | 6.14   | 5.458  | 6.02   | 1.509  | Kin      | antigenic determinant of rec-A protein                               |
| 1427526_at   | 7.36  | 5.759  | 4.614  | 4.027  | 4.387  | 1.505  | Fgfr1op2 | FGFR1 oncogene partner 2                                             |
| 1451796_s_at | 8.91  | 7.102  | 5.635  | 5.092  | 5.127  | 1.502  | Hdc      | histidine decarboxylase                                              |
| 1448851_a_at | 4.88  | 7.25   | 6.584  | 6.008  | 6.843  | 1.501  | Dnajc5   | DnaJ (Hsp40) homolog, subfamily C, member 5                          |
| 1449226_at   | 3.68  | 6.789  | 5.717  | 5.198  | 5.627  | 1.501  | Hic1     | hypermethylated in cancer 1                                          |
| 1417867_at   | 3.38  | 5.862  | 5.81   | 6.59   | 5.032  | -1.506 | Adn      | adipsin                                                              |
| 1423286_at   | 2.12  | 4.106  | 4.106  | 5.416  | 3.905  | -1.511 | Cbln1    | cerebellin 1 precursor protein                                       |
| 1423344_at   | 6.33  | 6.142  | 7.213  | 7.269  | 6.823  | -1.517 | Epor     | erythropoietin receptor                                              |
| 1419321_at   | 3.71  | 4.293  | 4.297  | 5.945  | 4.428  | -1.521 | F7       | coagulation factor VII                                               |
| 1419696_at   | 6.87  | 6.893  | 7.531  | 7.971  | 7.086  | -1.523 | Cd4      | CD4 antigen                                                          |
| 1418293_at   | 7.65  | 7.014  | 7.899  | 8.171  | 7.531  | -1.525 | Ifit2    | interferon-induced protein with tetratricopeptide repeats 2          |
| 1419232_a_at | 3.38  | 3.897  | 4.284  | 5.333  | 4.193  | -1.527 | Apoa1    | apolipoprotein A-I                                                   |
| 1420375_at   | 3.44  | 6.509  | 6.855  | 7.271  | 6.084  | -1.533 | Kif3a    | kinesin family member 3A                                             |
| 1448599_s_at | 2.51  | 5.713  | 6.3    | 7.64   | 6.693  | -1.534 | e        | DNA segment, Chr 4, Wayne State University 114, expressed            |
| 1449052_a_at | 4.59  | 7.77   | 8.454  | 8.866  | 8.016  | -1.534 | Dnmt3b   | DNA methyltransferase 3B                                             |
| 1454875_a_at | 6.87  | 6.347  | 6.103  | 7.277  | 5.492  | -1.541 | Rbbp4    | retinoblastoma binding protein 4                                     |
| 1419086_at   | 2.74  | 4.073  | 4.268  | 5.615  | 4.268  | -1.542 | Fgfbp1   | fibroblast growth factor binding protein 1                           |
| 1438651_a_at | 7.88  | 8.973  | 9.723  | 10.385 | 9.592  | -1.543 | Agtr1    | angiotensin receptor-like 1                                          |
| 1449380_at   | 3.02  | 4.924  | 5.781  | 5.992  | 5.298  | -1.551 | Pacsin1  | protein kinase C and casein kinase substrate in neurons 1            |
| 1455265_a_at | 3.68  | 4.588  | 4.991  | 6.106  | 4.953  | -1.556 | Rgs16    | regulator of G-protein signaling 16                                  |
| 1421251_at   | 2.12  | 3.832  | 4.146  | 5.451  | 4.208  | -1.557 | Zfp40    | zinc finger protein 40                                               |
| 1434920_a_at | 5.72  | 8.216  | 9.623  | 9.634  | 9.484  | -1.557 | Evl      | Ena-vasodilator stimulated phosphoprotein                            |
| 1450020_at   | 9.44  | 6.767  | 8.991  | 9.526  | 10.186 | -1.564 | Cx3cr1   | chemokine (C-X3-C) receptor 1                                        |
| 1455530_at   | 8.09  | 9.609  | 10.411 | 10.666 | 9.902  | -1.566 | Igh-6    | MGC:18788 IMAGE:4189350)                                             |
| 1424703_at   | 2.51  | 4.435  | 4.558  | 6.005  | 4.558  | -1.57  | Hemk1    | HemK methyltransferase family member 1                               |
| 1421902_at   | 2.28  | 4.132  | 4.301  | 5.714  | 4.301  | -1.582 | Ixl      | intersex-like (Drosophila)                                           |

| Probe set    | NLP   | D.WT  | D.E2   | T.WT   | T.E2   | INT    | Gene       | Gene information                                                    |
|--------------|-------|-------|--------|--------|--------|--------|------------|---------------------------------------------------------------------|
| 1422542_at   | 5.16  | 8.854 | 10.283 | 10.216 | 10.051 | -1.594 | Gpr34      | G protein-coupled receptor 34                                       |
| 1424697_at   | 4.88  | 6.027 | 6.955  | 7.244  | 6.553  | -1.619 | Dtwd1      | DTW domain containing 1                                             |
| 1438677_at   | 2.51  | 6.108 | 6.392  | 6.963  | 5.624  | -1.623 | Pkp4       | plakophilin 4                                                       |
| 1449025_at   | 10.49 | 7.333 | 8.241  | 8.383  | 7.659  | -1.632 | Ifit3      | interferon-induced protein with tetratricopeptide repeats 3         |
| 1451896_a_at | 2.51  | 5.476 | 6.289  | 6.479  | 5.659  | -1.633 | Cherp      | calcium homeostasis endoplasmic reticulum protein                   |
| 1448640_at   | 5.86  | 5.094 | 5.898  | 6.455  | 5.625  | -1.634 | Slc14a1    | solute carrier family 14 (urea transporter), member 1               |
| 1421450_a_at | 2.15  | 4.697 | 5.781  | 6.439  | 5.888  | -1.635 | Map3k4     | mitogen activated protein kinase kinase kinase 4                    |
| 1424295_at   | 3.44  | 5.41  | 6.056  | 6.568  | 5.567  | -1.647 | Dppa3      | developmental pluripotency-associated 3                             |
| 1435202_at   | 2.12  | 4.256 | 4.991  | 5.852  | 4.928  | -1.659 | Zfp574     | zinc finger protein 574                                             |
| 1419198_at   | 1.61  | 4.635 | 5.765  | 5.795  | 5.24   | -1.685 | Cbx8       | chromobox homolog 8 (Drosophila Pc class)                           |
| 1422122_at   | 7.36  | 4.954 | 5.894  | 6.82   | 6.059  | -1.701 | Fcer2a     | Fc receptor, IgE, low affinity II, alpha polypeptide                |
| 1454041_at   | 1.59  | 3.816 | 4.029  | 5.524  | 4.029  | -1.708 | 1e         | DNA segment, Chr 14, ERATO Doi 581, expressed                       |
| 1422814_at   | 5.73  | 5.826 | 7.061  | 6.933  | 6.459  | -1.709 | Aspm       | asp (abnormal spindle)-like, microcephaly associated (Drosophila)   |
| 1421187_at   | 4.5   | 4.832 | 6.74   | 6.607  | 6.803  | -1.712 | Ccr2       | chemokine (C-C motif) receptor 2                                    |
| 1450317_at   | 4.62  | 5.912 | 7.49   | 7.403  | 7.261  | -1.72  | Clec2g     | C-type lectin domain family 2, member g                             |
| 1421221_at   | 3.44  | 4.219 | 4.551  | 5.745  | 4.329  | -1.748 | Bcdo2      | beta-carotene 9', 10'-dioxygenase 2                                 |
| 1421531_at   | 1.61  | 4.103 | 4.851  | 5.398  | 4.396  | -1.75  | Akap3      | A kinase (PRKA) anchor protein 3                                    |
| 1420994_at   | 6.33  | 5.392 | 5.921  | 6.481  | 5.252  | -1.758 | B3gnt5     | UDP-GlcNAc:betaGal beta-1,3-N-acetylglucosaminyltransferase 5       |
| 1423253_at   | 3.38  | 4.687 | 5.094  | 6.866  | 5.508  | -1.765 | Mpz        | myelin protein zero                                                 |
| 1425640_at   | 2.75  | 4.763 | 4.7    | 5.909  | 4.07   | -1.776 | Aff1       | AF4/FMR2 family, member 1                                           |
| 1452166_a_at | 3.38  | 3.874 | 4.145  | 5.637  | 4.117  | -1.791 | Krt1-10    | keratin complex 1, acidic, gene 10                                  |
| 1435053_s_at | 1.23  | 4.343 | 5.687  | 6.027  | 5.561  | -1.81  | Plekhh1    | member 1                                                            |
| 1460363_at   | 8.4   | 6.436 | 6.919  | 7.573  | 6.218  | -1.838 | Tnrc6c     | trinucleotide repeat containing 6C                                  |
| 1435614_s_at | 3.02  | 5.469 | 6.261  | 6.306  | 5.233  | -1.865 | Rasgrf1    | RAS protein-specific guanine nucleotide-releasing factor 1          |
| 1424879_at   | 2.74  | 4.547 | 5.751  | 6.066  | 5.391  | -1.879 | Lrch4      | leucine-rich repeats and calponin homology (CH) domain containing 4 |
| 1420191_s_at | 2.88  | 5.453 | 5.717  | 6.221  | 4.595  | -1.89  | 94e        | DNA segment, Chr 16, Brigham & Women's Genetics 1494 expressed      |
| 1420353_at   | 2.51  | 4.031 | 4.23   | 5.973  | 4.279  | -1.893 | Lta        | lymphotoxin A                                                       |
| 1448609_at   | 3.92  | 4.029 | 5.171  | 6.264  | 5.487  | -1.919 | Tst        | thiosulfate sulfurtransferase, mitochondrial                        |
| 1423226_at   | 7.49  | 7.399 | 8.21   | 8.574  | 7.465  | -1.92  | Ms4a1      | membrane-spanning 4-domains, subfamily A, member 1                  |
| 1419908_at   | 5.86  | 6.431 | 7.571  | 8.007  | 7.223  | -1.924 | Uqcrb      | Fc receptor-like mucin-like 1 (Fcr1m1), mRNA                        |
| 1421037_at   | 3.02  | 5.067 | 6.411  | 7.066  | 6.468  | -1.942 | Npas2      | neuronal PAS domain protein 2                                       |
| 1426896_at   | 4.5   | 5.21  | 6.242  | 7.215  | 6.255  | -1.992 | Zfp191     | zinc finger protein 191                                             |
| 1419907_s_at | 6.87  | 6.972 | 8.043  | 8.849  | 7.926  | -1.994 | Fcr1m1     | Fc receptor-like mucin-like 1                                       |
| 1430986_at   | 7.36  | 4.629 | 5.079  | 6.629  | 5.017  | -2.062 | Fars1b     | phenylalanine-tRNA synthetase-like, beta subunit                    |
| 1452353_at   | 6.7   | 8.311 | 10.357 | 10.205 | 10.157 | -2.094 | Gpr155     | G protein-coupled receptor 155                                      |
| 1419426_s_at | 3.61  | 4.433 | 5.725  | 6.801  | 5.988  | -2.105 | Ccl21a /// | chemokine (C-C motif) ligand 21c (leucine)                          |
| 1450570_a_at | 3.68  | 4.255 | 5.473  | 6.78   | 5.87   | -2.128 | Cd19       | CD19 antigen                                                        |
| 1429782_at   | 9.44  | 5.200 | 5.969  | 7.084  | 5.672  | -2.181 | Grcc10     | gene rich cluster, C10 gene                                         |
| 1424825_a_at | 7.88  | 3.618 | 6.324  | 6.647  | 7.168  | -2.185 | Glycam1    | glycosylation dependent cell adhesion molecule 1                    |
| 1418287_a_at | 3.71  | 4.005 | 4.085  | 6.361  | 4.213  | -2.228 | Dmbt1      | deleted in malignant brain tumors 1                                 |
| 1434755_at   | 4.88  | 4.678 | 5.558  | 5.587  | 4.238  | -2.229 | Coro2b     | coronin, actin binding protein, 2B                                  |
| 1427216_at   | 2.51  | 4.91  | 6.565  | 6.05   | 5.475  | -2.23  | Ifnz       | interferon zeta                                                     |
| 1419126_at   | 6.11  | 5.194 | 6.561  | 7.459  | 6.561  | -2.265 | Hoxd9      | homeo box D9                                                        |
| 1425994_a_at | 2.51  | 4.573 | 5.031  | 6.162  | 4.282  | -2.338 | Asah2      | N-acylsphingosine amidohydrolase 2                                  |
| 1450734_at   | 5.54  | 6.091 | 7.691  | 7.421  | 6.608  | -2.413 | Lztr2      | leucine zipper transcription regulator 2                            |
| 1459916_at   | 8.40  | 8.137 | 9.664  | 10.233 | 9.074  | -2.686 | Pax5       | Paired box gene 5 (Pax5), mRNA                                      |
| 1416494_at   | 3.76  | 8.86  | 9.116  | 8.568  | 5.909  | -2.915 | Ndufs5     | NADH dehydrogenase (ubiquinone) Fe-S protein 5                      |
| 1449277_at   | 5.34  | 2.993 | 5.454  | 6.569  | 5.375  | -3.655 | Ccl19      | chemokine (C-C motif) ligand 19                                     |
