# Supplementary material
Source: PubMed Central journal article supplement (PMC2822898)
Supplement: NIHMS165052-supplement-5.pdf [file NIHMS165052-supplement-5.pdf]

**SUPPLEMENTARY TABLE 3****HUMAN MICROARRAY DATA PROCESSING AND SURVIVAL STATISTICAL ANALYSIS**

To generate a high confidence human *Ets2*-TAM signature, 407 probe sets (357 genes) with absolute INT values  $> 1.5$  were compared to the 98 lymph-node negative Rosetta cohort ((30), [www.rii.com/publications/2002](http://www.rii.com/publications/2002)) divided in to 2 groups based on lymphocyte/leukocyte infiltration status. Out of 2856 probe sets that had a significant differential expression profile between the two groups ( $p < 0.001$ , Student's t-test) 341 probe sets matched the 407 mouse homologues, with 142 mouse probe sets having p-value less than 0.05.

Microarray datasets (GSE2034 and GSE1456) were downloaded from the National Center for Biotechnology Information Gene Expression Omnibus (GEO) ([www.ncbi.nlm.nih.gov/geo](http://www.ncbi.nlm.nih.gov/geo)). The Rosetta dataset was downloaded from Rosetta Company website ([www.rii.com/publications/2002/vantveer.html](http://www.rii.com/publications/2002/vantveer.html)). The Affymetrix probe IDs denoting the *Ets2*-TAM Gene Signature were used to extract expression data from the GSE2034 and GSE1456 Series Matrix Table. Both of these studies were performed on an Affymetrix HU133 A platform. A total of 239 probes, corresponding to 118 genes, were retrieved from these datasets. For the NKI dataset, which is a custom array, HUGO Gene Symbols of the *Ets2*-TAM signature were utilized to extract out expression values for the corresponding genes present on the NKI microarray chip. This resulted in a dataset that had expression values for 113 genes (128 counting replicates for some genes).

Analysis of gene expression in breast cancer datasets were performed using BRB-Array Tools developed by Dr. Richard Simon and BRB-Array Tools Development team. Expression data were loaded onto BRB-Array Tools using the Data Import Wizard. Normalization and log-transformation (to base 2) was performed on the Wang dataset (GSE2034) using median center array on BRB-Array Tools. The expression values provided for the other two datasets were already normalized and log-transformed. Unsupervised clustering of each dataset was performed by using the samples only clustering option of BRB ArrayTools. K-means clustering was performed by using the uncentered correlation {for NKI and

GSE1456 (Stockholm)} and absolute uncentered correlation (for Wang) metrics. Samples were assigned into two groups based on this clustering, and Kaplan–Meier survival analysis was performed by using the Survival Analysis module of the software package StatsDirect. Significance of survival analysis was performed by using the Log-Rank (Peto) test. Hazard ratio indicates the relative risk for the ‘bad’ group versus the ‘good’ group for tumor relapse/recurrence.

(Note: The significance analysis has been repeated for each dataset using the Cox Regression test and the results are consistent with the Log-Rank p-value.)

### **HUMAN *Ets2*-TAM SIGNATURE**

- Genes highlighted in red are genes that are differentially regulated in lymphocyte/leukocyte infiltration –positive versus –negative breast cancer samples with high statistical significance ( $p < 10^{-4}$ ). Those highlighted in yellow have a p-value between  $10^{-4}$  and  $10^{-3}$ . Genes highlighted in blue have a p-value between  $10^{-3}$  and 0.05
- ‘Up’ and ‘down’ represents the trend of gene expression in lymphocyte/leukocyte infiltration –positive breast cancer samples when compared to the –negative samples

SUPPLEMENTARY TABLE 3. HUMAN *Ets2* -TAM SIGNATURE

**Gene** genes highlighted in red have  $p < 0.0001$   
 genes highlighted in yellow have  $p < 0.001$   
 genes highlighted in blue have  $p < 0.05$

| Accession#    | Gene Symbol | P-value    | Trend |
|---------------|-------------|------------|-------|
| U62325        | APBB2       | $<10^{-7}$ | Down  |
| NM_001673     | ASNS        | $<10^{-7}$ | Up    |
| NM_017680     | ASPN        | $<10^{-7}$ | Down  |
| NM_004049     | BCL2A1A     | $<10^{-7}$ | Up    |
| NM_001770     | CD19        | 0.000003   | Up    |
| NM_001797     | CDH11       | 0.000001   | Down  |
| AF018081      | COL18A1     | 0.000006   | Down  |
| Contig2578_RC | COL1A1      | 0.000005   | Down  |
| NM_000089     | COL1A2      | $<10^{-7}$ | Down  |
| NM_000090     | COL3A1      | $<10^{-7}$ | Down  |
| NM_000393     | COL5A2      | 0.000065   | Down  |
| NM_004369     | COL6A3      | $<10^{-7}$ | Down  |
| NM_001920     | DCN         | $<10^{-7}$ | Down  |
| NM_006892     | DNMT3B      | $<10^{-7}$ | Down  |
| NM_001387     | DPYSL3      | 0.000003   | Down  |
| NM_000136     | FANCC       | 0.000038   | Down  |
| NM_000138     | FBN1        | $<10^{-7}$ | Down  |
| NM_002775     | HTRA1       | $<10^{-7}$ | Down  |
| NM_001553     | IGFBP7      | $<10^{-7}$ | Down  |
| NM_014214     | IMPA2       | 0.000037   | Up    |
| NM_005544     | IRS1        | $<10^{-7}$ | Down  |
| NM_002290     | LAMA4       | $<10^{-7}$ | Down  |
| NM_002293     | LAMC1       | 0.000008   | Down  |
| NM_005576     | LOXL1       | $<10^{-7}$ | Down  |
| NM_003829     | MPDZ        | 0.000006   | Down  |
| NM_003953     | MPZL1       | $<10^{-7}$ | Up    |
| NM_002487     | NDN         | $<10^{-7}$ | Down  |
| NM_003894     | PER2        | $<10^{-7}$ | Down  |
| NM_007173     | PRSS23      | 0.000002   | Down  |
| AL049670      | RPL34P1     | 0.000012   | Up    |
| NM_002964     | S100A8      | 0.000002   | Up    |
| NM_002965     | S100A9      | 0.000005   | Up    |
| NM_004694     | SLC16A6     | 0.000014   | Down  |
| Contig2237_RC | SMOC2       | $<10^{-7}$ | Down  |
| NM_006941     | SOX10       | 0.000047   | Up    |
| NM_014467     | SRPX2       | $<10^{-7}$ | Down  |
| NM_003247     | THBS2       | 0.000082   | Down  |
| NM_000362     | TIMP3       | $<10^{-7}$ | Down  |
| NM_006670     | TPBG        | 0.000042   | Down  |
| NM_014232     | VAMP2       | 0.000001   | Down  |
| NM_004385     | VCAN        | $<10^{-7}$ | Down  |
| NM_005161     | APLNR       | 0.00015    | Up    |
| NM_001657     | AREG        | 0.00032    | Down  |
| NM_001681     | ATP2A2      | 0.000146   | Down  |
| NM_004327     | BCR         | 0.000572   | Up    |
| NM_006129     | BMP1        | 0.000106   | Up    |
| NM_001250     | CD40        | 0.000648   | Down  |

**Gene** genes highlighted in red have  $p < 0.0001$   
 genes highlighted in yellow have  $p < 0.001$   
 genes highlighted in blue have  $p < 0.05$

| Accession#     | Gene Symbol | P-value  | Trend |
|----------------|-------------|----------|-------|
| NM_000093      | COL5A1      | 0.000278 | Down  |
| NM_004378      | CRABP1      | 0.000553 | Up    |
| U67784         | CXCR7       | 0.000516 | Down  |
| NM_001943      | DSG2        | 0.000209 | Up    |
| NM_004461      | FARSB       | 0.000448 | Up    |
| AL050228       | FSTL1       | 0.000312 | Down  |
| NM_001530      | HIF1A       | 0.000208 | Up    |
| X58529         | IGH-6       | 0.000291 | Down  |
| AJ005273       | KIN         | 0.000191 | Up    |
| NM_001206      | KLF9        | 0.000138 | Down  |
| NM_000224      | KRT18       | 0.000366 | Down  |
| NM_005556      | KRT7        | 0.000108 | Up    |
| NM_002345      | LUM         | 0.000512 | Down  |
| NM_004552      | NDUFS5      | 0.000281 | Up    |
| NM_004289      | NFE2L3      | 0.000246 | Up    |
| NM_014057      | OGN         | 0.000878 | Down  |
| NM_017456      | PSCD1       | 0.00027  | Up    |
| NM_006868      | RAB31       | 0.000448 | Down  |
| Contig50913_RC | SMOC1       | 0.000607 | Up    |
| NM_004175      | SNRPD3      | 0.000263 | Up    |
| NM_006307      | SRPX        | 0.00025  | Down  |
| NM_003312      | TST         | 0.000771 | Up    |
| NM_003474      | ADAM12      | 0.003375 | Down  |
| NM_006988      | ADAMTS1     | 0.030525 | Down  |
| NM_007038      | ADAMTS5     | 0.009199 | Down  |
| NM_012098      | ANGPTL2     | 0.004436 | Down  |
| NM_001149      | ANK3        | 0.049777 | Down  |
| NM_001630      | ANXA8       | 0.029727 | Up    |
| AK001565       | AP3M1       | 0.046754 | Down  |
| NM_000648      | CCR2        | 0.002891 | Down  |
| NM_020404      | CD248       | 0.018763 | Down  |
| NM_000616      | CD4         | 0.018636 | Down  |
| AF098641       | CD44        | 0.004086 | Up    |
| NM_001778      | CD48        | 0.005904 | Up    |
| NM_004931      | CD8B1       | 0.016986 | Down  |
| Y16521         | CDS2        | 0.004179 | Down  |
| NM_013943      | CLIC4       | 0.038808 | Up    |
| NM_017649      | CNNM2       | 0.041078 | Down  |
| M92642         | COL16A1     | 0.039434 | Up    |
| NM_001881      | CREM        | 0.00746  | Up    |
| NM_001896      | CSNK2A2     | 0.041543 | Up    |
| NM_001901      | CTGF        | 0.00325  | Down  |
| NM_004734      | DCLK1       | 0.002595 | Down  |
| NM_001937      | DPT         | 0.02876  | Down  |
| NM_000121      | EPOR        | 0.003027 | Down  |
| NM_000131      | F7          | 0.003918 | Down  |
| NM_003902      | FUBP1       | 0.009583 | Up    |
| NM_005300      | GPR34       | 0.001835 | Down  |
| NM_012259      | HEY2        | 0.028872 | Down  |
| NM_001528      | HGFAC       | 0.036221 | Up    |
| X69111         | ID3         | 0.008904 | Down  |

**Gene** genes highlighted in red have  $p < 0.0001$   
 genes highlighted in yellow have  $p < 0.001$   
 genes highlighted in blue have  $p < 0.05$

| Accession#    | Gene Symbol | P-value  | Trend |
|---------------|-------------|----------|-------|
| NM_000877     | IL1R1       | 0.011431 | Down  |
| X52015        | IL1RN       | 0.02708  | Up    |
| NM_007035     | KERA        | 0.011078 | Down  |
| NM_000421     | KRT10       | 0.013334 | Down  |
| NM_002273     | KRT8        | 0.002858 | Down  |
| NM_000595     | LTA         | 0.013368 | Up    |
| NM_005926     | MFAP1A      | 0.001466 | Down  |
| NM_006983     | MMP23B      | 0.001343 | Down  |
| NM_000139     | MS4A1       | 0.001404 | Down  |
| AF234532      | MYO10       | 0.004972 | Up    |
| NM_000434     | NEU1        | 0.007816 | Down  |
| NM_006164     | NFE2L2      | 0.027787 | Up    |
| X72631        | NR1D1       | 0.0059   | Down  |
| NM_012327     | PIGN        | 0.031566 | Down  |
| NM_003628     | PKP4        | 0.012    | Down  |
| NM_006347     | PPIH        | 0.001564 | Up    |
| M30773        | PPP3R1      | 0.007799 | Down  |
| Contig50675   | PRRX1       | 0.042689 | Down  |
| NM_000963     | PTGS2       | 0.002694 | Down  |
| NM_002852     | PTX3        | 0.002254 | Up    |
| NM_006505     | PVR         | 0.020424 | Down  |
| NM_003702     | RGS20       | 0.034815 | Up    |
| AL137448      | RIPK4       | 0.002276 | Down  |
| NM_000994     | RPL32       | 0.046897 | Up    |
| NM_001001     | RPL36A      | 0.008991 | Down  |
| Contig2236_RC | RPL37A      | 0.002411 | Up    |
| NM_001000     | RPL39       | 0.009187 | Up    |
| Contig1508_RC | SDC2        | 0.019969 | Down  |
| NM_012431     | SEMA3E      | 0.026089 | Down  |
| NM_014331     | SLC7A11     | 0.043474 | Down  |
| NM_002354     | TACSTD1     | 0.010319 | Up    |
| NM_000361     | THBD        | 0.001286 | Down  |
| NM_003313     | TSTA3       | 0.008105 | Up    |
| AB002347      | UBR2        | 0.00775  | Down  |
| NM_006634     | VAMP5       | 0.002309 | Up    |
